# Supplementary material
Source: MDPI journal article supplement (https://www.mdpi.com/2073-8994/13/2/361)
Supplement: s1 [file s1]

## SUPPLEMENTARY MATERIAL

### Isolation and structure elucidation of a novel symmetrical macrocyclic phthalate hexaester

Michiya Kamio<sup>1</sup>, Weina Jiang<sup>1</sup>, Hiroki Osada<sup>1</sup>, Masayuki Fukuoka<sup>1</sup>,  
Hajime Uchida<sup>2</sup>, Ryuichi Watanabe<sup>2</sup>, Toshiyuki Suzuki<sup>2</sup> and Hiroshi  
Nagai<sup>1\*</sup>

<sup>1</sup>*Department of Ocean Sciences, Tokyo University of Marine Science and Technology,  
Tokyo, Japan*

<sup>2</sup>*Fisheries Technology Institute, Yokohama, Japan*

\*Corresponding author. E-Mail: nagai@kaiyodai.ac.jp

**Abstract:** A novel symmetrical macrocyclic hexaester (**1**) and a macrocyclic tetraester (**2**), were isolated during a natural product exploring program on the cyanobacterium *Moorea producens*. Their structures were elucidated based on spectroscopic data, including nuclear magnetic resonance and high-resolution mass spectra. In the antibacterial activity test, compounds **1** and **2** showed no bioactivity at the concentration tested.

**Keywords:** phthalate ester; cyanobacterium; *Moorea producens*, isolation; structural elucidation

## Table of Contents

Figure S1. HR-ESI-MS spectrum of compound **1**

Figure S2.  $^1\text{H}$ -NMR spectrum of compound **1** in  $\text{CD}_3\text{OD}$

Figure S3.  $^{13}\text{C}$ -NMR spectrum of compound **1** in  $\text{CD}_3\text{OD}$

Figure S4.  $^1\text{H}$ - $^1\text{H}$  COSY spectrum of compound **1** in  $\text{CD}_3\text{OD}$

Figure S5.  $^1\text{H}$ - $^{13}\text{C}$  HSQC spectrum of compound **1** in  $\text{CD}_3\text{OD}$

Figure S6.  $^1\text{H}$ - $^{13}\text{C}$  HMBC spectrum of compound **1** in  $\text{CD}_3\text{OD}$

## Display Report

### Analysis Info

Analysis Name D:\Data\H.U\20160201\_Kou\20160201\_Kou2\Kou\_3\_18\_5\_4\_C4\_BA2\_01\_2359.d  
Method 20160129\_fe.ms.ms4.m  
Sample Name Kou\_3\_18\_5\_4\_C4  
Comment  
Acquisition Date 2/1/2016 2:38:42 PM  
Operator BDAL@DE  
Instrument micrOTOF-Q 10380

### Acquisition Parameter

|             |            |                       |           |                  |           |
|-------------|------------|-----------------------|-----------|------------------|-----------|
| Source Type | ESI        | Ion Polarity          | Positive  | Set Nebulizer    | 1.6 Bar   |
| Focus       | Not active | Set Capillary         | 4500 V    | Set Dry Heater   | 180 °C    |
| Scan Begin  | 150 m/z    | Set End Plate Offset  | -500 V    | Set Dry Gas      | 8.0 l/min |
| Scan End    | 1200 m/z   | Set Collision Cell RF | 650.0 Vpp | Set Divert Valve | Waste     |

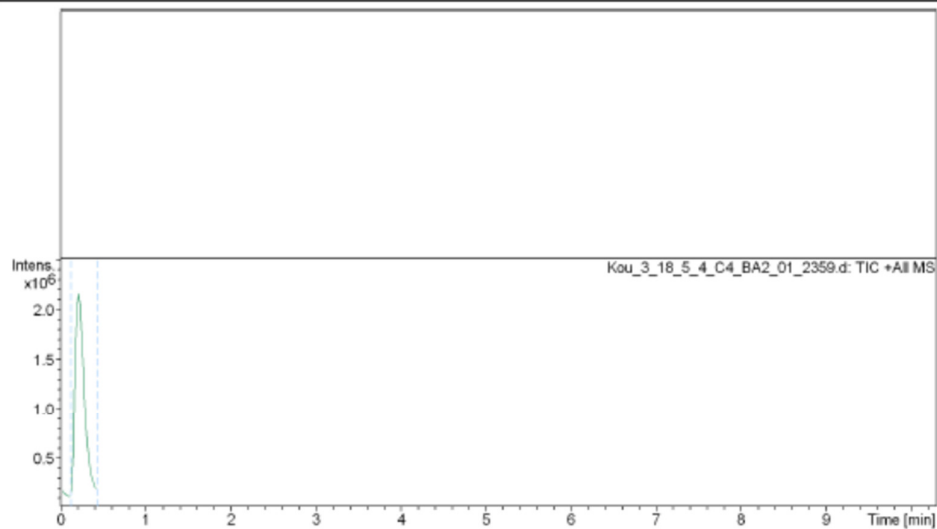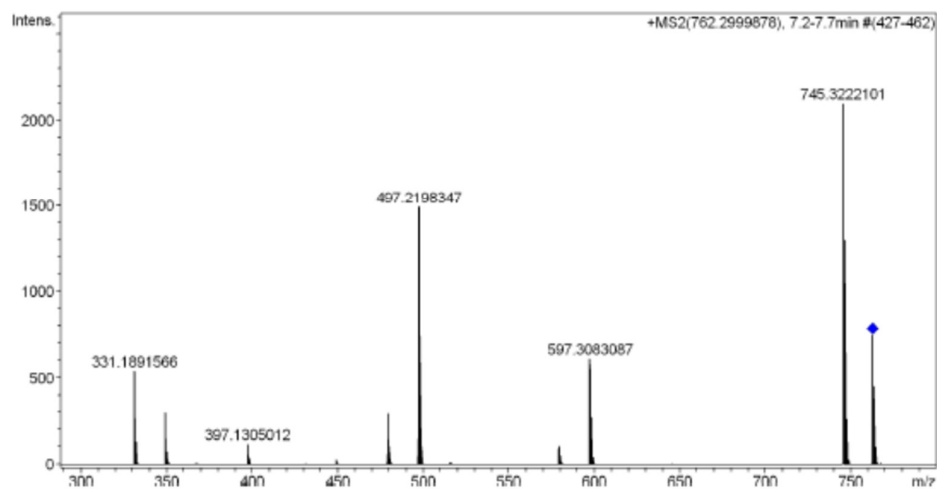

Figure S1. HR-ESI-MS spectrum of compound 1

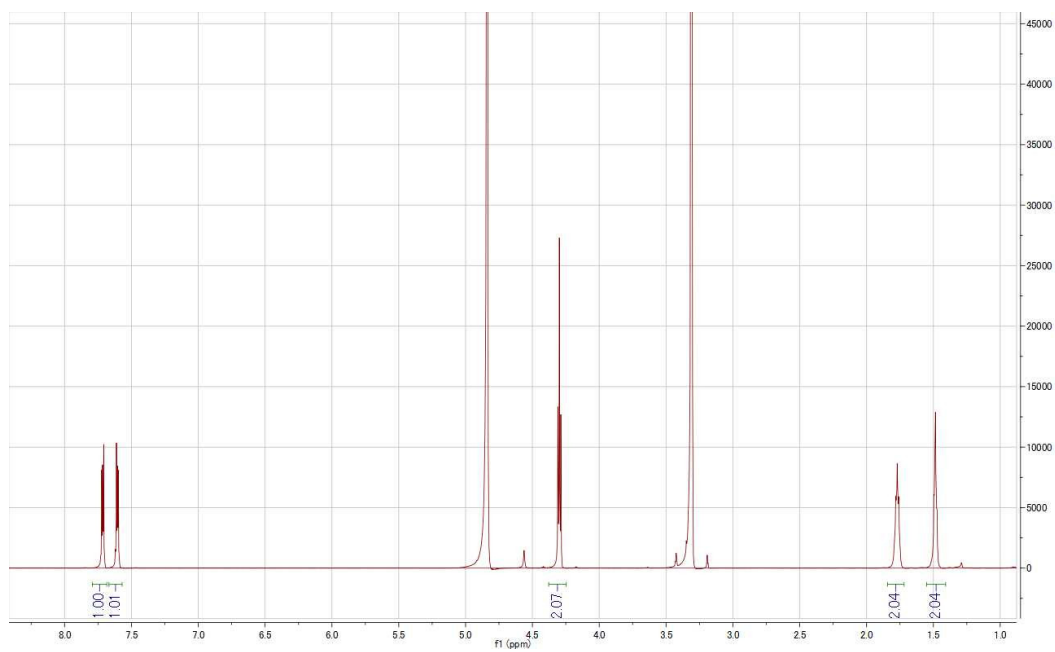

Figure S2.  $^1\text{H}$ -NMR spectrum of compound **1** in  $\text{CD}_3\text{OD}$

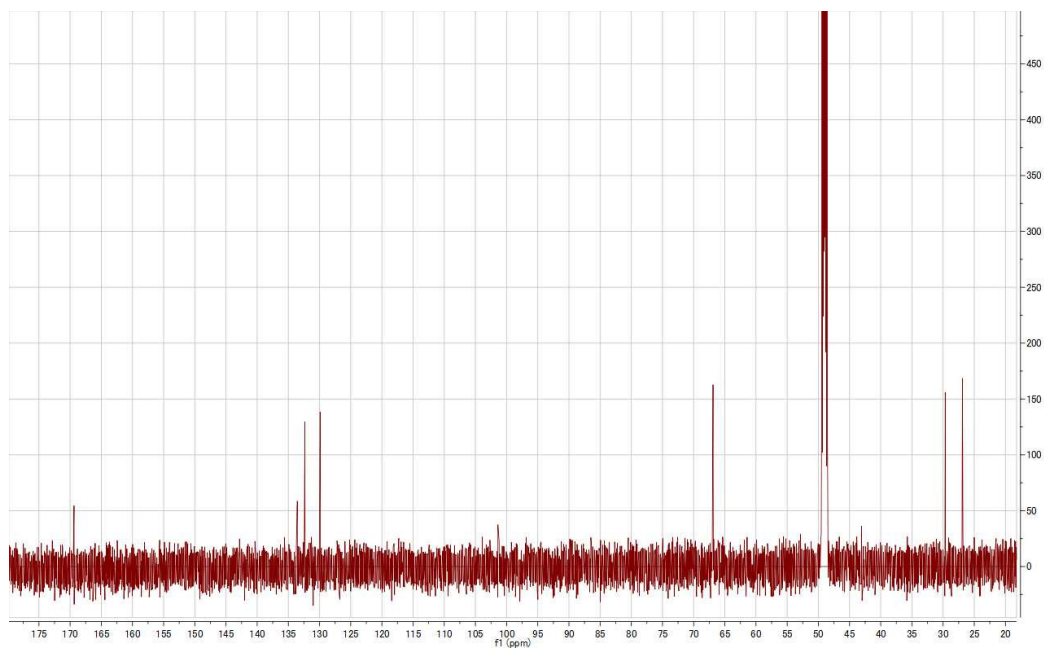

Figure S3.  $^{13}\text{C}$ -NMR spectrum of compound **1** in  $\text{CD}_3\text{OD}$

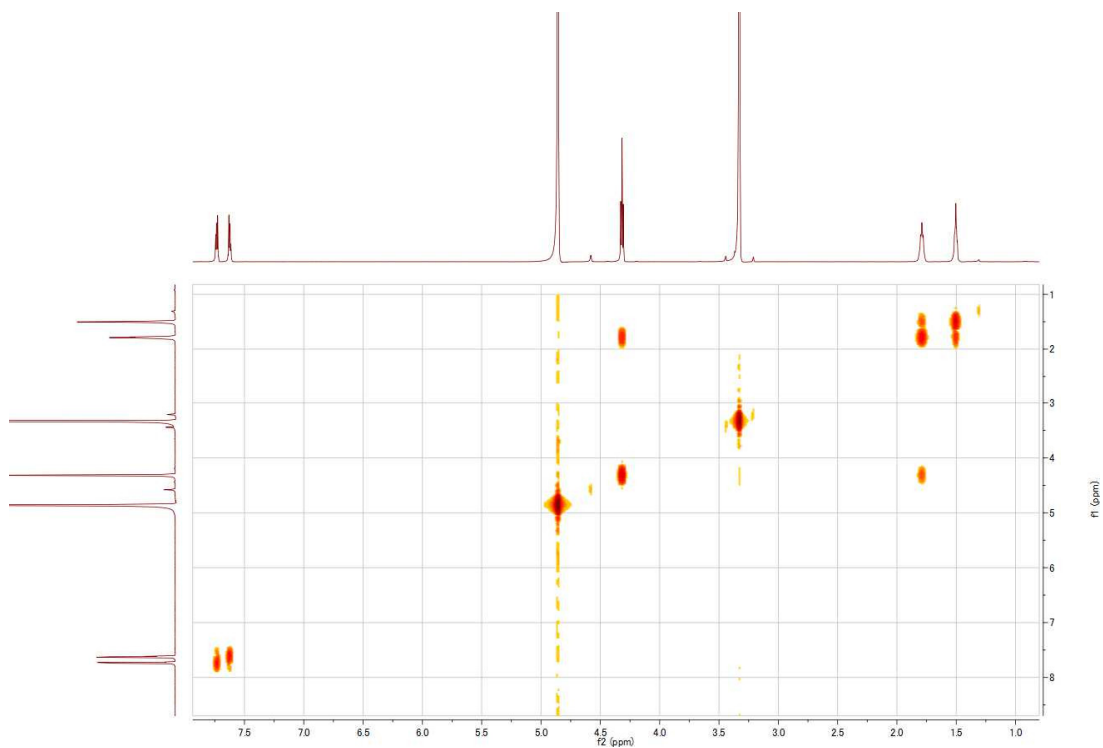

Figure S4.  $^1\text{H}$ - $^1\text{H}$  COSY spectrum of compound **1** in  $\text{CD}_3\text{OD}$

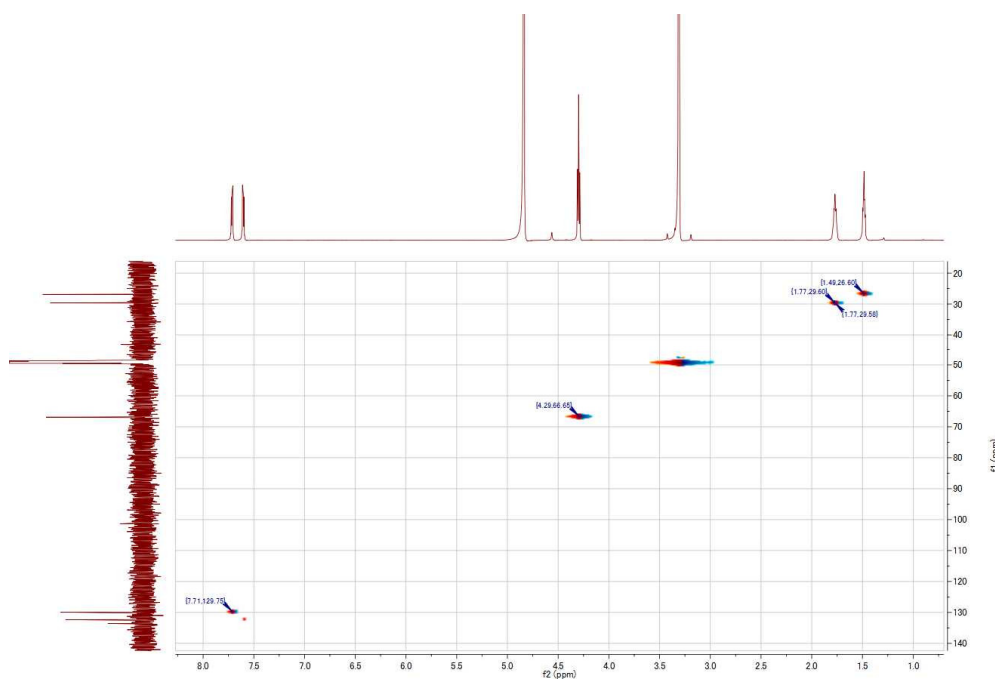

Figure S5.  $^1\text{H}$ - $^{13}\text{C}$  HSQC spectrum of compound **1** in  $\text{CD}_3\text{OD}$

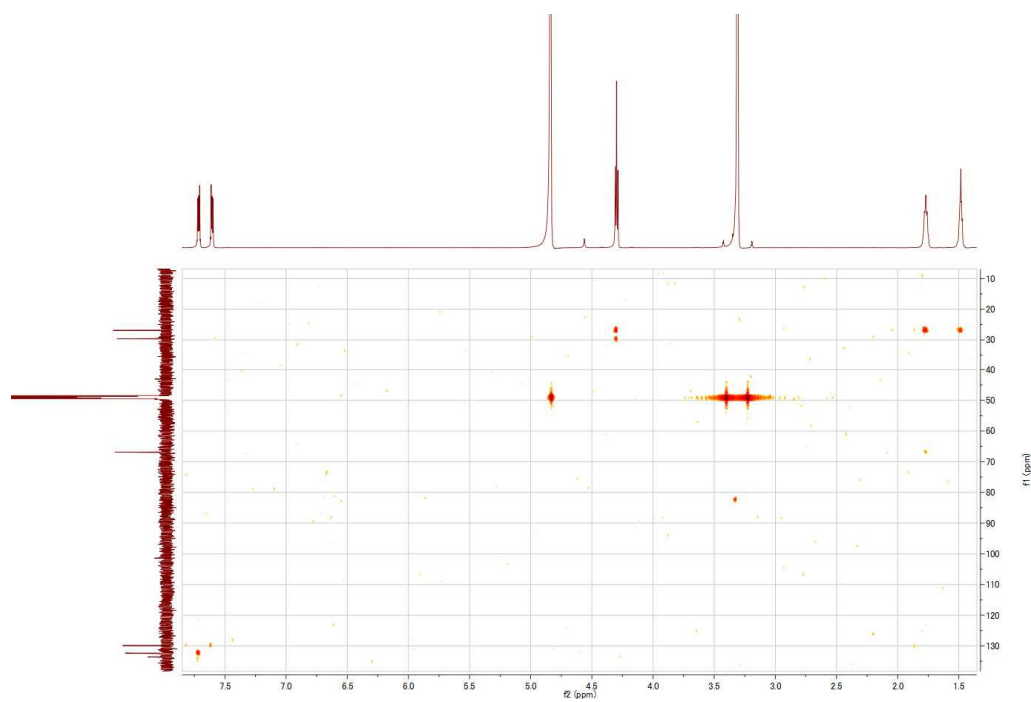

Figure S6.  $^1\text{H}$ - $^{13}\text{C}$  HMBC spectrum of compound **1** in  $\text{CD}_3\text{OD}$
